# Supplementary material
Source: PubMed Central journal article supplement (PMC3021438)
Supplement: supp_jn.110.129106_nut129106_F01.pdf [file supp_jn.110.129106_nut129106_F01.pdf]

## Online Supporting Material

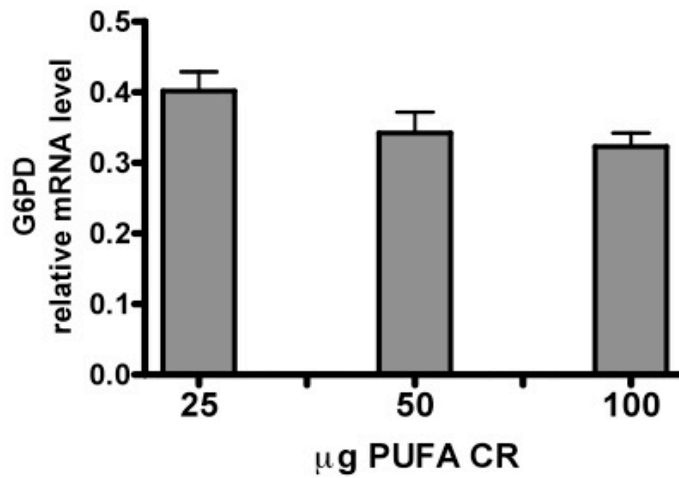

**Supplemental Figure 1** Increasing amounts of polyunsaturated fatty acid-enriched chylomicron remnants (PUFA CR) inhibit the insulin stimulation of G6PD mRNA accumulation in rat hepatocytes. Values are expressed relative to hepatocytes treated with insulin alone, which was set at 1. Each bar represents the mean  $\pm$  SEM of  $n=3$  independent hepatocyte isolations. ANOVA indicates a significant effect of PUFA CR,  $p<0.05$  and each bar is significantly different from hepatocytes treated with insulin alone,  $p<0.05$ .

## Online Supporting Material

**Supplemental Table 1 Primers Used in Quantitative RT-PCR Analysis.** Primers to rat mRNA sequences were designed and synthesized using PrimerQuest (Integrated DNA Technologies). The specificity of primers was verified by BLAST analysis, visualization of RT-PCR products by ethidium bromide staining after agarose gel electrophoresis, and by melt curve analysis of PCR products.

| mRNA                                         | Primers                                                                                                                               |
|----------------------------------------------|---------------------------------------------------------------------------------------------------------------------------------------|
| Acetyl-CoA carboxylase-1                     | sense, 5'-AGGGCAAAGGGACTGGTGTTCAGAT-3'<br>antisense, 5'-GCCAACGGAGATGGTTCATCCATTA-3'                                                  |
| ATP-citrate lyase                            | sense, 5'-TGGTTTCATCGGCGTTGCGTTT -3'<br>antisense, 5'-TTGGCTTCCATGCCTGCACAT-3'                                                        |
| Cyclophilin B                                | sense, 5'-CGTGGGCTCCGTTGTCTT-3'<br>antisense, 5'-TGACTTTAGGTCCTTCTTCTTATC                                                             |
| Fatty acid synthase                          | sense, 5'-TGCAACTGTGCGTTAGCCACC-3'<br>antisense, 5'-TGTTTCAGGGGAGAAGAGACC-3'                                                          |
| Glucokinase                                  | sense, 5'-GGAGACTTCTCTCCTTAAGAC-3'<br>antisense, 5'-ATTGGCGGTCTTCATAGTAGC-3'                                                          |
| Glucose 6-phosphate dehydrogenase            | sense, 5'-TATGTCTATGGCAGCCGAGGT-3'<br>antisense, 5'- GCAGAGTGCAGATGGTGTAAAG -3'<br>probe, 5'-FAM/CCACAGAGGCAGATGAGCTGATGAAGAA/3BHQ-3' |
| Malic enzyme                                 | sense, 5'-TTGTTGCCACCCTGCATTGTCA-3'<br>antisense, 5'-ACAACATCTTCTGGCCATGCGT-3'                                                        |
| Pyruvate kinase, liver                       | sense, 5'-GATGAAATTCTAGAAG-3'<br>antisense, 5'-GCTTCGTCAGCACGATG-3'                                                                   |
| Spot-14                                      | sense, 5'-CAGGAGGTGACGCAGAAATAC-3'<br>antisense, 5'-GTGAGGTAAATACAGCGTCCC-3'                                                          |
| Stearoyl-CoA desaturase-1                    | sense, 5'-AGCTCAGCCAAATGCTGTGTTGTC-3'<br>antisense, 5'-TGCCTTGATCAGTCACAGACACCT-3'                                                    |
| Sterol regulatory element binding protein-1c | sense, 5'-ACGACGGAGCCATGGATTGCAC-3'<br>antisense, 5'-CCGGAAGGCAGGCTTGAGTACC-3'                                                        |
